# Supplementary material for: A near-infrared fluorophore for live-cell super-resolution microscopy of cellular proteins
Source: Springer Nature journal article supplement (doi:10.1038/nchem.1546), 2013-01-04
Supplement: 41557_2013_BFnchem1546_MOESM9_ESM.mol [file 41557_2013_BFnchem1546_MOESM9_ESM.mol]

  ChemDraw12111212053D

 48 53  0  0  0  0  0  0  0  0999 V2000
    2.8382   -1.6930   -0.0000 C   0  0  0  0  0  0  0  0  0  0  0  0
    2.1237   -2.1055   -0.0000 C   0  0  0  0  0  0  0  0  0  0  0  0
    2.1237   -0.4555   -0.0000 C   0  0  0  0  0  0  0  0  0  0  0  0
    1.4093   -1.6930   -0.0000 C   0  0  0  0  0  0  0  0  0  0  0  0
    1.4093   -0.8680   -0.0000 C   0  0  0  0  0  0  0  0  0  0  0  0
    2.1237    0.4554   -0.0000 C   0  0  0  0  0  0  0  0  0  0  0  0
    2.8382    0.8679   -0.0000 C   0  0  0  0  0  0  0  0  0  0  0  0
    2.8382    1.6929   -0.0000 C   0  0  0  0  0  0  0  0  0  0  0  0
    2.1237    2.1054   -0.0000 Si  0  0  0  0  0  0  0  0  0  0  0  0
    1.4092    0.8679   -0.0000 C   0  0  0  0  0  0  0  0  0  0  0  0
    1.4092    1.6929   -0.0000 C   0  0  0  0  0  0  0  0  0  0  0  0
    3.5527    0.4555   -0.0000 C   0  0  0  0  0  0  0  0  0  0  0  0
    4.2671    0.8680   -0.0000 C   0  0  0  0  0  0  0  0  0  0  0  0
    3.5526    2.1054   -0.0000 C   0  0  0  0  0  0  0  0  0  0  0  0
    4.2671    1.6930   -0.0000 C   0  0  0  0  0  0  0  0  0  0  0  0
    0.6948    0.4555   -0.0000 C   0  0  0  0  0  0  0  0  0  0  0  0
   -0.0196    0.8680    0.0000 C   0  0  0  0  0  0  0  0  0  0  0  0
    0.6948    2.1054   -0.0000 C   0  0  0  0  0  0  0  0  0  0  0  0
   -0.0196    1.6930    0.0000 C   0  0  0  0  0  0  0  0  0  0  0  0
   -0.7341    2.1055    0.0000 N   0  0  0  0  0  0  0  0  0  0  0  0
    4.9815    2.1055   -0.0000 N   0  3  0  0  0  0  0  0  0  0  0  0
    4.9815    2.9305   -0.0000 C   0  0  0  0  0  0  0  0  0  0  0  0
   -1.4485    1.6930    0.0000 C   0  0  0  0  0  0  0  0  0  0  0  0
   -0.7340    2.9305    0.0000 C   0  0  0  0  0  0  0  0  0  0  0  0
    0.6948   -2.1055   -0.0000 C   0  0  0  0  0  0  0  0  0  0  0  0
    0.6948   -2.9305   -0.0000 O   0  0  0  0  0  0  0  0  0  0  0  0
    2.8382    2.5179   -0.0000 C   0  0  0  0  0  0  0  0  0  0  0  0
    1.4092    2.5179   -0.0000 C   0  0  0  0  0  0  0  0  0  0  0  0
    5.6960    1.6930   -0.0000 C   0  0  0  0  0  0  0  0  0  0  0  0
   -1.4117   -0.8468   -0.0000 C   0  0  0  0  0  0  0  0  0  0  0  0
   -2.1261   -2.0843   -0.0000 C   0  0  0  0  0  0  0  0  0  0  0  0
   -2.1261   -0.4343   -0.0000 C   0  0  0  0  0  0  0  0  0  0  0  0
   -2.8405   -1.6718   -0.0000 C   0  0  0  0  0  0  0  0  0  0  0  0
   -0.6972   -2.0842   -0.0000 C   0  0  0  0  0  0  0  0  0  0  0  0
   -3.5550   -0.4344   -0.0000 C   0  0  0  0  0  0  0  0  0  0  0  0
   -1.4117   -1.6718   -0.0000 C   0  0  0  0  0  0  0  0  0  0  0  0
   -2.8405   -0.8469   -0.0000 C   0  0  0  0  0  0  0  0  0  0  0  0
   -0.0197   -1.6930   -0.0000 N   0  0  0  0  0  0  0  0  0  0  0  0
   -3.5550    0.3906   -0.0000 N   0  0  0  0  0  0  0  0  0  0  0  0
   -4.2695    0.8030   -0.0000 N   0  0  0  0  0  0  0  0  0  0  0  0
   -4.9840    0.3906   -0.0000 C   0  0  0  0  0  0  0  0  0  0  0  0
   -4.9840   -0.4344   -0.0000 N   0  0  0  0  0  0  0  0  0  0  0  0
   -4.2695   -0.8469   -0.0000 N   0  0  0  0  0  0  0  0  0  0  0  0
   -5.6960    0.8017   -0.0000 C   0  0  0  0  0  0  0  0  0  0  0  0
    2.8382   -0.8680   -0.0000 C   0  0  0  0  0  0  0  0  0  0  0  0
    3.4902   -0.5180   -0.0000 C   0  0  0  0  0  0  0  0  0  0  0  0
    3.4839    0.1336   -0.0000 O   0  0  0  0  0  0  0  0  0  0  0  0
    4.1982   -0.9361   -0.0000 O   0  5  0  0  0  0  0  0  0  0  0  0
 45  1  1  0      
  2  1  2  0      
  3 45  2  0      
  4  2  1  0      
  5  3  1  0      
  5  4  2  0      
  3  6  1  0      
  6  7  2  0      
  9  8  1  0      
 10  6  1  0      
 11  9  1  0      
 12  7  1  0      
  8  7  1  0      
 13 12  2  0      
 14  8  2  0      
 15 13  1  0      
 15 14  1  0      
 16 10  1  0      
 17 16  2  0      
 18 11  1  0      
 19 17  1  0      
 19 18  2  0      
 19 20  1  0      
 15 21  2  0      
 21 22  1  0      
 20 23  1  0      
 20 24  1  0      
  4 25  1  0      
 25 26  2  0      
 25 38  1  0      
  9 27  1  0      
  9 28  1  0      
 10 11  2  0      
 21 29  1  0      
 30 32  1  0      
 30 36  2  0      
 31 33  2  0      
 31 36  1  0      
 32 37  2  0      
 33 37  1  0      
 34 36  1  0      
 35 37  1  0      
 34 38  1  0      
 35 39  2  0      
 39 40  1  0      
 40 41  2  0      
 41 42  1  0      
 42 43  2  0      
 43 35  1  0      
 41 44  1  0      
 45 46  1  0      
 46 47  2  0      
 46 48  1  0      
M  CHG  2  21   1  48  -1
M  END
